1 **Morph-specific patterns of sex organ positions in species with style length**

2 **polymorphism**

3

4 Shatarupa Ganguly, Deepak Barua

5 Department of Biology, Indian Institute of Science Education and Research, Pune, India

6

7 Author for correspondence

8 Shatarupa Ganguly

9 Email: shatarupa.ganguly23@gmail.com

10

11 **Running title:** Herkogamy is higher in the short-styled morph

12

13

14 **Abstract**

15 In style length polymorphism, morph-specific sequence of encountering male and female sex  
16 organs within a flower by pollinators can cause differences in the need to avoid self-  
17 pollination and encourage inter-morph pollination. We asked if this difference can lead to  
18 disparity in stigma-anther separation (herkogamy) between morphs and spatial match  
19 between sex organs of complementary morphs (reciprocity). Further, we tested if herkogamy,  
20 and hence the level of selfing, is fairly constant among individuals of a population.  
21 Additionally, we examined the relationship between herkogamy and reciprocity among  
22 individuals of a population to understand functional interactions between these two  
23 morphological traits. Using data on sex organ heights for >200 heterostylous species from the  
24 literature, we observed that the short-styled morph had higher herkogamy as compared to the  
25 long-styled morph indicating a higher need to avoid selfing. Reciprocity did not show a  
26 consistent difference between the upper and lower sex organs implying a strong influence of  
27 local ecological factors. In most populations, allometric relationships suggested that  
28 herkogamy and hence the level of selfing remains constant. Finally, we observed that  
29 herkogamy and reciprocity can be related among individuals of a population, sometimes  
30 indicating a potential trade-off between avoidance of self-pollination and facilitation of inter-  
31 morph pollination.

32

33 **Keywords:** cross species comparison - distyly - stigma-height dimorphism – herkogamy -  
34 reciprocity

35

## 36 INTRODUCTION

37 Sex organ positions in heterostylous plants are considered to play an important role in  
38 efficient inter-morph pollen transfer and hence maintenance of this style length  
39 polymorphism (Barrett & Shore, 2008). The differences in the relative position of anther and  
40 stigma between morphs causes differences in their physical interaction to various pollinators  
41 giving rise to morph-specific pollen pick up and deposition patterns. Morph-specific patterns  
42 in pollen transfer can result in differences in self, intra-morph and inter-morph pollen  
43 exchange, and subsequently influence selection for higher or lower herkogamy in morphs or  
44 reciprocity between complementary sex organs. General patterns of relative sex organ  
45 positions within and between morphs can potentially reveal the morphological basis of  
46 predominant morph-specific strategies of intra- and inter-morph pollen exchange. However,  
47 despite the presence of a large amount of information on sex organ positions in the extant  
48 literature, predictions related to general patterns of differences in herkogamy and reciprocity  
49 over a large number of heterostylous taxa have not been tested.

50

51 Heterostyly and stigma-height dimorphism are kinds of style-length polymorphism which is  
52 defined as the presence of two or three distinct floral morphs within a population differing in  
53 style lengths (Barrett, Jesson, & Baker, 2000). In heterostyly, the morphs additionally differ  
54 in anther positions resulting in reciprocal arrangement of sex organs between complementary  
55 morphs, a feature stigma-height dimorphism lacks (Baker, 2000; Barrett, 2002). In distyly  
56 (dimorphic heterostyly) both morphs exhibit ordered herkogamy where spatially separated  
57 male and female sex organs are encountered in a specific sequence. In the long-styled morph,  
58 the pollinator encounters the stigma first and then the anthers akin to approach herkogamy  
59 where the stigma is higher than the anthers in a flower (Webb & Lloyd, 1986; Opedal, 2018).

60 In the short-styled morph the anthers are presented before the stigma to the pollinators similar  
61 to reverse herkogamy where the anther is higher than the stigma in a flower. Therefore, there  
62 is a higher chance of self-pollination in the short-styled morph as the pollinator can pick up  
63 pollen from the anthers before reaching the stigma of the same flower (Webb & Lloyd,  
64 1986). This can lead to pollen discounting, stigma clogging, and in the absence of absolute  
65 heteromorphic incompatibility can also result in illegitimate fertilization (Zhou *et al.*, 2015).  
66 Consequently, there can be a potential reduction, especially in female fitness, of the short-  
67 styled morph. Hence, the short-styled morph is likely to have higher herkogamy than the  
68 long-styled morph to compensate for the higher chance of self-pollination.

69

70 As most plants with style length polymorphism have narrow corolla tubes, long-tongued  
71 pollinators are essential to ensure pollen transfer between the upper-level long-styled stigma  
72 and the short-styled anther as well as the lower level short-styled stigma and the long-styled  
73 anther (Ganders, 1979; Lloyd & Webb, 1992a; Simón-Porcar, Santos-Gally, & Arroyo,  
74 2014). The upper-level sex organs can come in contact with most floral visitors as they are  
75 situated at the collar of, or exerted from the corolla tube (Nishihiro *et al.*, 2000). Hence  
76 pollen exchange between the anther and stigma of the upper level can take place more  
77 frequently than the lower level. In fact, the long-styled stigma commonly exhibits higher total  
78 pollen loads than the short-styled stigma tube (Nicholls, 1985; Stone & Thomson, 1994; Liu,  
79 Wu, & Huang, 2016; Jacquemyn, Gielen, & Brys, 2018). The deposition of surplus pollen on  
80 the long-styled stigma might result in relaxed selection for high reciprocity between the sex  
81 organs of complementary morphs of the upper level (Haddadchi, 2013).

82

83 Fundamental differences in relative sex organ positions between morphs can also bring about  
84 morph-specific patterns of intrapopulation variation in herkogamy and consequently pollen  
85 flow. Herkogamy is a composite trait which is derived from the male and female sex organ  
86 positions within a flower (Opedal *et al.*, 2017). Allometric changes in stigma and anther  
87 heights with respect to the corolla tube have been used to quantify the relative contribution of  
88 male and female sex organs towards changes in herkogamy (Richards & Koptur, 1993; Faivre  
89 & McDade, 2001). To maintain the same degree of herkogamy, changes in anther and stigma  
90 positions with changes in flower size within a population are expected to be isometric.  
91 However, if the change in size any of the sex organs is accelerated or deaccelerated relative  
92 to the other sex organ, herkogamy will vary across individuals. Since larger organs are  
93 expected to show higher variance (Runions & Geber, 2000; Opedal *et al.*, 2017), the long-  
94 styled stigma and the short-styled anthers can exhibit greater changes in size across  
95 individuals as compared to the short-styled stigma and the long-styled anther. However,  
96 variation in anther height can be restricted as the anthers in most heterostylous species are  
97 attached to the corolla tube (Ganders, 1979). Thus a change in anther position will have  
98 concurrent functional consequences related to a change in corolla tube dimensions (Faivre,  
99 2000). Hence, both anther and stigma positions can influence variation in herkogamy in the  
100 short-styled morph. The relative contribution of the male and female sex organs to the  
101 intrapopulation variation in herkogamy will determine whether pollen export or pollen receipt  
102 is more affected as a consequence of its impact on how sex organs come in contact with the  
103 pollinator's body (Herlihy & Eckert, 2007).

104

105 The extent of intra- and inter-morph pollen exchange is determined by both herkogamy and  
106 reciprocity (Keller, Thomson, & Conti, 2014). Differences in herkogamy among individuals  
107 of a population can be related or unrelated to differences in reciprocity of the same

108 individuals with sex organs of the complementary morph. Such a relationship can reveal how  
109 a change in organ heights that results in reduced or increased herkogamy and associated  
110 changes in the chance of self-pollination will simultaneously influence reciprocity and the  
111 chance of inter-morph pollination. Moreover, the relationship between herkogamy and  
112 reciprocity can also depend on the morph identity revealing selection pressures unique to a  
113 morph. The presence or lack of a relationship between herkogamy and reciprocity also has  
114 implications for understanding selection for reproductive assurance or against inbreeding  
115 depression.

116

117 In this study, we conducted a literature survey and collected data on sex organ position in  
118 dimorphic style length polymorphisms - distyly and stigma-height dimorphism. We  
119 performed phylogenetically corrected statistical analysis to ask whether mean herkogamy is  
120 higher in the short-styled morph indicating a greater need to avoid self-pollination. Similarly,  
121 we tested if mean reciprocity is lower in the upper sex organ level as compared to the lower  
122 sex organ level due to high pollen deposition on the long-styled stigma. To understand the  
123 potential morph-specific implications of intra-population variation in herkogamy on pollen  
124 flow, we asked if anther and stigma positions within flowers varied isometrically with respect  
125 to each other among individuals of a population. As described earlier, we expect the stigma  
126 position in the long-styled morph and both the anther as well as stigma position in the short-  
127 styled morph to have relatively greater contribution towards intra-population variation in  
128 herkogamy. Finally, we examined the relationship between herkogamy and reciprocity  
129 among individuals of populations to identify potential trade-offs between avoidance of self-  
130 pollination and inter-morph pollination.

131

## 132 MATERIALS AND METHODS

133 Literature Survey and data extraction: We conducted an exhaustive literature search using the  
134 keywords style length polymorphism, heterostyly, distyly and stigma-height dimorphism. To  
135 begin with, searches were performed using the ISI Web of Science and Google Scholar.  
136 Subsequently, we also conducted searches for the references cited in and cited by the initially  
137 identified publications. This study was restricted to the dimorphic character states of style  
138 length polymorphism, i.e., distyly and stigma-height dimorphism. The following data were  
139 extracted from these publications: (a) mean sex organ heights of both morphs for a population  
140 when reported for multiple individuals of each morph; (b) mean herkogamy when reported  
141 for multiple individuals for each morph; and, (c) anther and stigma heights of individuals of a  
142 population when this information was available for at least ten individuals of each morph. We  
143 extracted data from text, tables, scaled floral illustrations, and when necessary, by digitising  
144 graphs and figures using the software PlotDigitizer (<http://plotdigitizer.sourceforge.net>). The  
145 mean heights of the four sex organs were used to standardize herkogamy and reciprocity  
146 values to enable comparison across species with varying flower sizes. The mean species-level  
147 herkogamy data was used to make comparison between morphs. The data for anther and  
148 stigma heights of individuals were used to derive reciprocity and occasionally herkogamy  
149 when the mean herkogamy information was reported for a species.

150 Calculation of Mismatch and herkogamy: As per convention (Lloyd & Webb, 1992b; Olesen  
151 *et al.*, 2003), the long-styled stigma and the short-styled anther were defined as the upper  
152 level, and the short-styled stigma and the long-styled anther were defined as the lower level  
153 complementary sex organ positions. Reciprocity was calculated using the sex organ heights  
154 of individuals of a population as the mismatch between anther and stigma heights of the  
155 complementary morphs (Ganguly & Barua, 2020). To incorporate the effects of intra-  
156 population variation in sex organ heights, the absolute mismatch for every complementary

157 stigma-anther pair was calculated and averaged for the upper and lower levels of sex organ  
158 positions. When mean herkogamy for both morphs of a population was not reported, it was  
159 calculated as the absolute difference in anther and stigma heights within a flower and  
160 averaged over individuals for each morph separately (Opedal, 2018). To understand which  
161 sex organ was relatively more important in bringing about morph-specific difference in  
162 herkogamy, we compared mean anther and stigma heights at each sex organ level. Paired t-  
163 test was performed to compare mean mismatch between sex organ levels, mean herkogamy  
164 between morphs, and mean anther and stigma heights at each sex organ level across species.

165

166 To understand how many species have higher herkogamy in the short-styled morph and  
167 higher mismatch in the upper-level sex organ as per our predictions, we performed  
168 independent t-test for each species to compare herkogamy and mismatch between morphs and  
169 levels, respectively. To this end, we derived herkogamy as the difference between stigma and  
170 anther heights of an individual for the species for which sex organ heights of individuals of a  
171 population were available. We calculated the mismatch of every individual as the average of  
172 the mismatch of the stigma of that individual with anthers of all the individuals of the  
173 complementary morph.

174

175 Phylogenetic correction: We performed phylogenetically corrected paired t-test (Lindenfors,  
176 Revell, & Nunn, 2010) to examine differences in mismatch, herkogamy and sex organ  
177 heights between levels and morphs. Phylogenetically corrected statistical tests were  
178 performed using the R packages phytools (Revell, 2012) and ape (Paradis, Claude, &  
179 Strimmer, 2004). For the statistical analyses, species names were obtained from The Plant  
180 List (Version 1.1. Published on the Internet; <http://www.theplantlist.org/>, accessed on



181 December 2018). The recent comprehensive phylogenetic tree for seed plants provided by  
182 Smith and Brown (2018) was used for the phylogenetically corrected statistical tests. Species  
183 which were not present in the tree provided by Smith and Brown (2018) were excluded from  
184 the analyses. When data for multiple populations of the same species were present, the  
185 population with the largest sample size was chosen for the analyses. Moreover, as differences  
186 in flower size among species could influence the results, mean herkogamy and mismatch for  
187 both morphs of each species were standardised using the grand mean of all four sex organ  
188 heights for that species. To assess the representation of different flower sizes in the data, we  
189 calculated the mean of average sex organ height of the upper level as a surrogate for flower  
190 size.

191

192 Allometric relationships: In this section we used data on sex organ heights of individuals of a  
193 population when sex organ heights for at least 30 individuals of each morph were available.  
194 Some species were represented by multiple populations as long as the criterion of sample size  
195 was met. We examined the allometric relationships between anther and stigma heights of  
196 individuals of a population. The allometry between anther and stigma heights was examined  
197 by quantifying the slope of ranged major axis (RMA) type II regression using lmodel2  
198 package (Legendre, 2018) of R (*ver 4.0.0*) (R Core Team, 2020). RMA regressions were  
199 used because of different variances in the estimates of anther and stigma heights (Legendre,  
200 1998). We used *p-values* and 95% CI of the slope estimate to ask whether the slope was  
201 significantly different from one to test if the anther and stigma heights were isometrically  
202 related to each other.

203 Relationship between herkogamy and reciprocity: The populations used to study allometric  
204 relationships between anther and stigma heights were also used to understand the relationship

205 between herkogamy and reciprocity. We calculated mismatch for an individual as the average  
206 of all the mismatches between stigma height of that individual and anther heights of all  
207 individuals of the complementary morph. This measure of reciprocity reflects the chances of  
208 pollen deposition on the stigma of that individual and hence is a measure of female fitness.  
209 To examine the relationship between herkogamy and reciprocity, we calculated Pearson's  
210 correlation coefficient between herkogamy and mismatch among individuals of each morph  
211 of a population.

212

## 213 **RESULTS**

214 Details of the extracted data: The final number of references used for this study after applying  
215 the selection criteria was 87. The initial data for mean herkogamy included 249 distylous  
216 species represented by 459 populations, and 23 species with stigma height dimorphism  
217 represented by 44 populations. Information for anther and stigma heights of individuals of a  
218 population of a species was available for 119 distylous species (211 populations) from 14  
219 families, and 17 species (34 populations) from 7 families with stigma-height dimorphism.  
220 Overall, the number of species with distyly and stigma-height dimorphism used in this study  
221 represented 18 of 28 families (Naiki, 2012) for which heterostyly has been reported till date  
222 (Supplementary information Fig. S1). The range of flower sizes examined in this study  
223 (Supplementary information Fig. S1) was representative of the range of flower sizes reported  
224 for heterostylous species (Ganders, 1979).

225 Difference in herkogamy between morphs: Out of the total number of species for which data  
226 for mean herkogamy for the long- and short-styled morphs was available, 230 distylous  
227 species and all 18 species with stigma-height dimorphism were present in the phylogenetic  
228 tree of seed plants provided in Smith & Brown (2018) (Supplementary information Table

229 S1). Only these species were used for the phylogenetic corrected analyses. High variation in  
230 herkogamy was observed for both morphs especially in distylous species ranging from 0.39%  
231 to 155.10% of the grand mean of sex organ heights of both morphs. As expected, mean  
232 herkogamy was significantly higher in the short-styled morph compared to the long-styled  
233 morph in distylous species ( $t = 3.12$ ,  $df = 229$ ,  $p$ -value = 0.002; Fig. 1). The outcome was  
234 consistent after phylogenetically corrected paired t-test was performed ( $t = 3.13$ ,  $df = 227$ ,  $p$ -  
235 value = 0.002; Fig. 1). Similarly, in species with stigma-height dimorphism, mean herkogamy  
236 was higher in the short-styled morph ( $t = 2.65$ ,  $df = 17$ ,  $p$ -value = 0.02; Fig. 1). However,  
237 phylogenetically corrected paired t-test revealed no significant differences in herkogamy for  
238 the two morphs ( $t = 0.17$ ,  $df = 15$ ,  $p$ -value = 0.87).

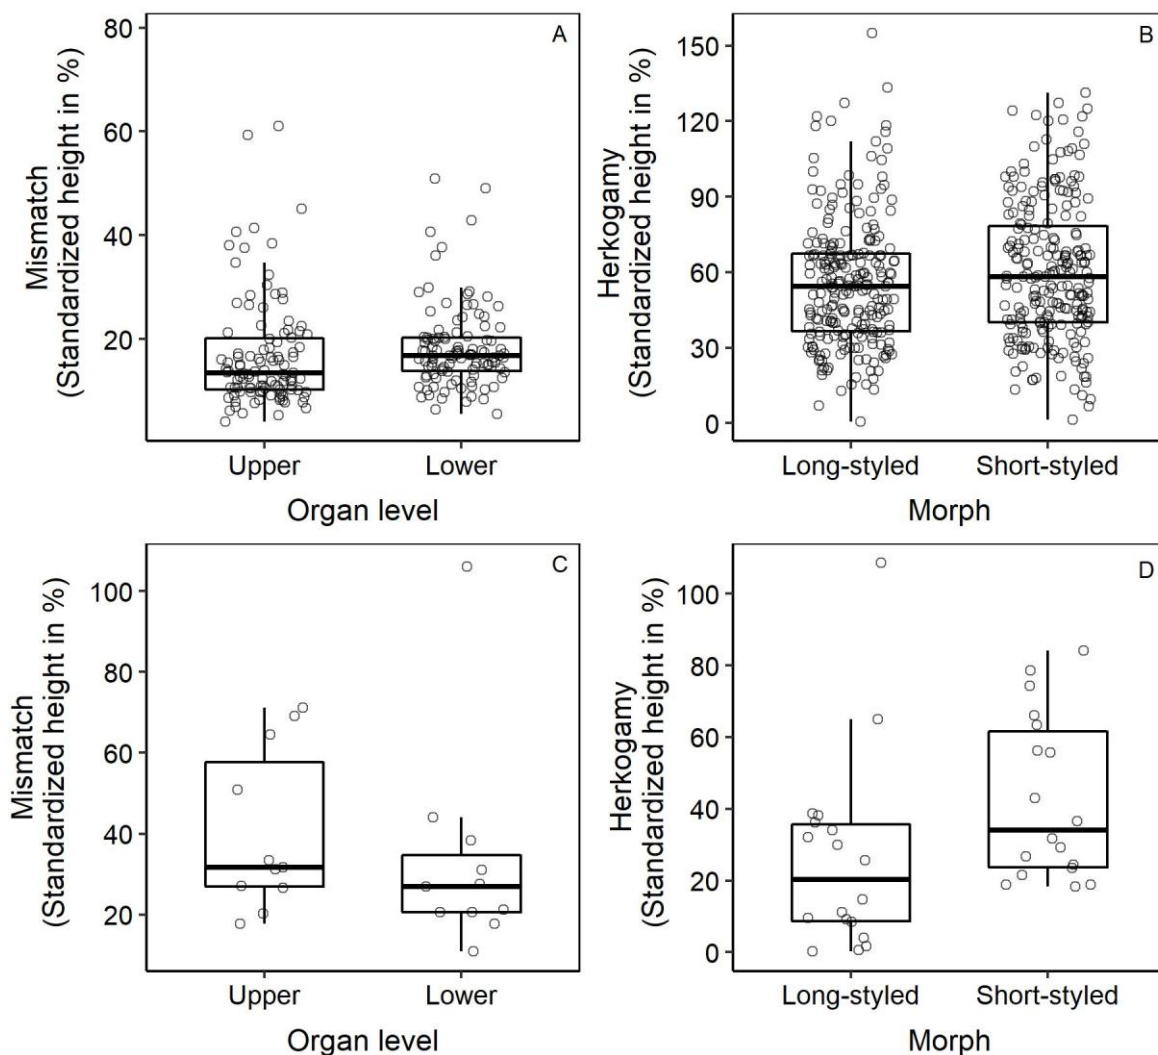

240 **Figure 1:** Mismatch (A and C) and herkogamy (B and D) in species with distyly (A and B)  
241 and stigma height dimorphism (C and D) presented as a percentage of the grand mean of all  
242 four mean sex organs heights. The sample sizes for herkogamy are 230 species for distyly  
243 and 18 species for stigma-height dimorphism. The sample sizes for mean mismatch are 107  
244 species for distyly and 11 for stigma height dimorphism. The bold line in the boxplots  
245 represents the median, the ends of the box represent the first and the third quartiles and the  
246 whiskers represent 1.5 times the interquartile range.

247

248 Out of the 107 distylous species for which anther and stigma heights were available for  
249 individuals of the population, 53 species exhibited significantly higher mean herkogamy in  
250 the short-styled morph as compared to 35 species where the long-styled morph had higher  
251 herkogamy. In a total of 11 species with stigma-height dimorphism, 8 species displayed  
252 higher herkogamy in the short-styled morph as compared to 3 species which exhibited higher  
253 herkogamy in the long-styled morph.

254

255 Mean stigma height of the long-styled morph was marginally higher than mean anther height  
256 of the short-styled morph in distylous species ( $t = 1.89$ ,  $df = 229$ ,  $p\text{-value} = 0.06$ ) but the  
257 difference was not significant on performing phylogenetically corrected paired t-test ( $t =$   
258  $0.67$ ,  $df = 227$ ,  $p\text{-value} = 0.5$ ). However, mean anther height of the long-styled morph was  
259 significantly higher than mean stigma height of the short-styled morph in distylous species  
260 when analysed without ( $t = 7.05$ ,  $df = 229$ ,  $p\text{-value} < 0.001$ ) or with phylogenetic correction ( $t$   
261  $= 2.66$ ,  $df = 227$ ,  $p\text{-value} = 0.008$ ). In species with stigma-height dimorphism, mean stigma  
262 height of the long-styled morph was not significantly higher than mean anther height of the  
263 short-styled morph ( $t = 1.59$ ,  $df = 17$ ,  $p\text{-value} = 0.13$ ), while mean stigma height of the short-  
264 styled morph was significantly smaller than the mean anther height of the long-styled morph  
265 ( $t = -10.40$ ,  $df = 17$ ,  $p\text{-value} < 0.001$ ). However, both were not statistically significant when

266 phylogenetically corrected paired t-test was performed ( $t = 0.05$ ,  $df = 15$ ,  $p\text{-value} = 0.96$  and  $t$   
267  $= -0.20$ ,  $df = 15$ ,  $p\text{-value} = 0.85$ , respectively).

268 Difference in mean mismatch between sex organ levels: The final number of species which  
269 were present in the phylogenetic tree (Smith & Brown, 2018) and hence were used for  
270 statistical analyses was 107 for distylous species and 11 for species with stigma-height  
271 dimorphism. Mean mismatch between the upper and lower sex organ levels was not  
272 significantly different in species with distyly ( $t = 1.17$ ,  $df = 106$ ,  $p\text{-value} = 0.25$ ; Fig. 1) or  
273 stigma height dimorphism ( $t = -0.73$ ,  $df = 10$ ,  $p\text{-value} = 0.48$ ). These differences were also  
274 not significant after phylogenetically corrected paired t-test was performed for species with  
275 distyly ( $t = 1.19$ ,  $df = 104$ ,  $p\text{-value} = 0.24$ ) as well as stigma-height dimorphism ( $t = -0.05$ ,  $df$   
276  $= 8$ ,  $p\text{-value} = 0.98$ ).

277 Out of the abovementioned 107 distylous species, 63 species exhibited significantly higher  
278 mismatch in the upper level as compared to 30 species where the lower level had higher  
279 mismatch. In the 11 species with stigma-height dimorphism, 3 species displayed higher  
280 mismatch in the upper level as compared to 8 species which exhibited higher mismatch in the  
281 lower level.

282

283 Allometric relationship between anther and stigma heights: The average slope of the  
284 relationship between stigma and anther heights of individuals was  $1.10 \pm 1.47$  (mean  $\pm$  95%  
285 CI;  $n = 73$  populations) for the long-styled morph, and  $1.10 \pm 0.27$  (mean  $\pm$  95% CI;  $n = 79$   
286 populations) for the short-styled morph in distylous species. In species with stigma-height  
287 dimorphism, the average slope was  $1.33 \pm 0.48$  (mean  $\pm$  95% CI;  $n = 17$  populations) and  
288  $1.03 \pm 0.73$  (mean  $\pm$  95% CI;  $n = 14$  populations) for the long- and short-styled morphs,  
289 respectively.

290

291 Out of the 50 long-styled and 55 short-styled distylous populations which exhibited a  
 292 significant slope, 31 long-, and 39 short-styled populations had slopes which were not  
 293 significantly different from one according to the 95% CI (Table 1 A). Higher change in  
 294 stigma height as compared to the anther height was observed in 17 long-styled and 10 short-  
 295 styled populations. On the other hand, greater increase in anther height as compared to stigma  
 296 height was observed in one long-styled and four short-styled distylous populations. One long-  
 297 and two short-styled populations negative relationship between anther and stigma heights.

298

299 **Table 1:** Details of the slope of the allometric relationship between stigma and anther heights  
 300 of species with: A) distyly; and B) stigma-height dimorphism. Numbers denote the number of  
 301 populations with RMA regression slope in that category according to the 95% CI. Each  
 302 column represents the number of populations with that slope value with  $P < 0.05$  for RMA  
 303 regression. LS refers to the long-styled morph while SS refers to the short-styled morph.

|                                        | <b>Morp<br/>h</b> | <b>slope =<br/>1</b> | <b>slope &lt;<br/>0</b> | <b>0 &lt; slope &lt;<br/>1</b> | <b>slope &gt;<br/>1</b> |
|----------------------------------------|-------------------|----------------------|-------------------------|--------------------------------|-------------------------|
| <b>A) Distyly</b>                      | LS                | 31                   | 1                       | 17                             | 1                       |
|                                        | SS                | 39                   | 2                       | 10                             | 4                       |
| <b>B) Stigma-height<br/>dimorphism</b> | LS                | 11                   | 0                       | 2                              | 1                       |
|                                        | SS                | 7                    | 0                       | 1                              | 1                       |

304

305 Of the 15 long-styled and 9 short-styled populations with stigma-height dimorphism which  
 306 exhibited a significant slope, 11 long-styled and 7 short-styled populations had slopes which  
 307 were not significantly different from one according to the 95% CI (Table 1 B). A higher  
 308 change in stigma height as compared to anther height was observed for two long-styled and  
 309 one short-styled populations. A higher change in anther height as compared to stigma height  
 310 was exhibited by one population of long- and short-styled morphs each. There were no

311 populations which exhibited a negative relationship between anther and stigma heights.  
312 Overall, interestingly, the value of slope differed among different populations of the same  
313 species.  
314 Relationship between herkogamy and mismatch: Both long- and short-styled morphs of the  
315 distylous populations exhibited positive as well as negative relationships between herkogamy  
316 and mismatch. There was no significant difference in the number of positive and negative  
317 relationship in the long-styled ( $\chi^2$  test:  $p$ -value = 0.63,  $n$  = 73 populations) and short-styled  
318 ( $\chi^2$  test:  $p$ -value = 0.09,  $n$  = 79 populations) morphs in distylous populations (Table 2 A). On  
319 the other hand, species with stigma-height dimorphism had a significantly higher number of  
320 populations with a positive relationship in both long-styled ( $\chi^2$  test:  $p$ -value < 0.001,  $n$  = 17  
321 populations) and short-styled ( $\chi^2$  test:  $p$ -value < 0.001,  $n$  = 14 populations) populations (Table  
322 2 B).

323

324 **Table 2:** Relationship between herkogamy and mismatch in A) distyly and B) stigma-height  
325 dimorphism for the long- and the short-styled morph. Negative and positive denote negative  
326 or positive Pearson's correlation coefficient between the two traits. The numbers denote the  
327 number of populations with the direction of the relationship followed by the number of  
328 populations with correlation coefficients with  $P < 0.05$  in brackets.

| Character state                    | Morph        | Negative | Positive |
|------------------------------------|--------------|----------|----------|
| <b>A) Distyly</b>                  | Long-styled  | 34 (22)  | 39 (30)  |
|                                    | Short-styled | 32 (12)  | 47 (22)  |
| <b>B) Stigma-height dimorphism</b> | Long-styled  | 0 (0)    | 17 (15)  |
|                                    | Short-styled | 2 (0)    | 12 (10)  |

329

330 **DISCUSSION**

331 The results from this study revealed how morph-specific selection pressures and  
332 developmental constraints can shape variation in herkogamy and reciprocity in species with  
333 distyly and stigma-height dimorphism. Herkogamy was higher in the short-styled morph  
334 possibly reflecting the importance of avoiding self-pollination especially in this morph.  
335 Reciprocity was not higher in the lower sex organ level as expected and examination at the  
336 species level showed no consistent pattern. This implies that reciprocity may be dependent on  
337 local factors, for example, the kind and abundance of visiting pollinators. As expected,  
338 allometric relationship between anther and stigma heights revealed that in most cases  
339 herkogamy was constant among individuals of a population. The allometric relationship also  
340 revealed that when herkogamy varied among individuals, the variation was largely driven by  
341 the stigma position of both morphs in distylous species. This suggests that in most cases,  
342 intra-population variation in herkogamy will possibly affect pollen receipt more than pollen  
343 export in both morphs. Both negative and positive relationships between herkogamy and  
344 reciprocity was observed implying that the relationship is shaped by local factors specific to a  
345 morph or population.

346

347 Understanding differences in sex organ heights between morphs has been a central subject of  
348 various studies on heterostylous species (Thompson & Dommee, 2000; Kudoh *et al.*, 2001;  
349 Kálmán *et al.*, 2007). Differences in herkogamy between morphs have been reported for a lot  
350 of species with distyly and stigma-height dimorphism (Thompson & Dommee, 2000; Cesaro  
351 *et al.*, 2004; Li *et al.*, 2010; Liu *et al.*, 2012; Faife-Cabrera, Ferrero, & Navarro, 2014; Novo  
352 *et al.*, 2018; Barranco, Arroyo, & Santos-Gally, 2019). Such differences between morphs are  
353 associated with differences in inter-morph pollen transfer due to avoidance of self- and intra-



354 morph pollination (Baena-Díaz *et al.*, 2012; Keller *et al.*, 2014). Higher herkogamy has been  
355 observed in the short-styled morph in single species studies in species with distyly as well as  
356 stigma-height dimorphism. However, numerous examples of higher herkogamy in the long-  
357 styled morph are also available as evident in the results from this analysis of a larger number  
358 of species (Opler, Baker, & Frankie, 1975; Barrett & Richards, 1990; Massinga, Johnson, &  
359 Harder, 2005; Jones, 2012; Hernández-Ramírez, 2012; Haddadchi, 2013; Meeus *et al.*, 2013;  
360 Faife-Cabrera *et al.*, 2014). An important factor which was beyond the scope of this study is  
361 the presence and degree of heteromorphic incompatibility which, along with herkogamy, can  
362 reduce chances of illegitimate mating (Pailler & Thompson, 1997). Mechanisms like the  
363 presence of incompatibility and dichogamy can compensate for the loss in female fitness due  
364 to lower herkogamy (Cesaro *et al.*, 2004; Simon-Porcar *et al.*, 2015). The lack of information  
365 for the non-binary nature of the degree of incompatibility and the distinction between self,  
366 intra-morph and inter-morph incompatibility makes it difficult to compare among species  
367 hence inhibiting its inclusion in a study like this. That the majority of species in this analysis  
368 exhibited higher herkogamy in the short-styled morph suggests the order of presentation of  
369 anther and stigma remains a hindrance to increasing outcrossing irrespective of other  
370 selection pressures.

371

372 The comparison of mean sex organ heights at each level revealed that the significantly lower  
373 height of the short-styled stigma as compared to the long-styled anther of the lower sex organ  
374 level can be instrumental in achieving a higher herkogamy in the short-styled morph. This is  
375 perhaps because most distylous species have anthers attached to the corolla tube and hence  
376 changes in anther height may be more constrained. It has been suggested that the short-styled  
377 stigma is under opposing selection pressures for maintaining herkogamy and facilitating  
378 easier contact with pollinators by increasing its height (Nishihiro *et al.*, 2000). This study

379 indicates that maintaining herkogamy could be more important for the short-style morph of  
380 most distylous species.

381

382 Considered to be one of the primary factors facilitating inter-morph pollen transfer,  
383 reciprocity has been at the centre of studies dealing with heterostylous species. As with  
384 herkogamy, many studies have compared the reciprocity among the upper and lower sex  
385 organ levels (Lau & Bosque, 2003; Keller *et al.*, 2016; Jacquemyn *et al.*, 2018). Although  
386 more species exhibited lower reciprocity in the upper sex organ level, the overall results from  
387 our analysis were contrary to our expectation of lower reciprocity in the upper sex organ  
388 level. As pollinator size, tongue-length, behaviour and abundance can play a significant role  
389 in determining sex organ positions as well as inter-morph pollen transfer, they are possibly  
390 responsible for the observed lack of a pattern (Pérez-Barrales, Arroyo, & Scott Armbruster,  
391 2007; Pérez-Barrales & Arroyo, 2010; Santos-Gally *et al.*, 2013; Simón-Porcar *et al.*, 2014).  
392 In fact, a study suggests that plants coevolve with efficient long-tongued pollinators and  
393 exhibit higher reciprocity when they are abundant or are the primary pollinators (Ferrero *et*  
394 *al.*, 2011).

395 Floral coevolution with various pollinators determines the level of floral phenotypic  
396 integration or floral trait correlations (Berg, 1960). Species with style length polymorphism,  
397 mostly characterised with tubular corolla, are expected to be pollinated by specialised long-  
398 tongued pollinators leading to a relatively high trait correlation. As expected, in most species  
399 stigma and anther heights were positively related to each other. Surprisingly there were a few  
400 species where anther and stigma height were negatively related. The lack of a relationship or  
401 a weak relationship observed in some of the populations can be indication of pollination by a  
402 less efficient pollinator (Pérez-Barrales *et al.*, 2007; Perez-Barrales *et al.*, 2014). Isometry

403 was observed in both morphs in most populations with distyly and stigma-height dimorphism  
404 indicating maintenance of the degree of herkogamy and the level of outcrossing. Pollen are  
405 deposited on specific points of pollinator's body from where it is picked up by the stigma.  
406 Intra-population variation in sex organ position reduces the efficiency of pollen exchange due  
407 to inconsistency in the position onto or from which pollen is deposited or picked up from the  
408 pollinator's body (Armbruster *et al.*, 2017). Pollen export and outcross siring success are  
409 relatively more affected when anther position fluctuates more, whereas, outcross pollen  
410 deposition is more affected if stigma position exhibits more fluctuation (Herlihy & Eckert,  
411 2007). Overall, in both long- and short-styled morphs, stigma height contributed more to  
412 variation in herkogamy than anther height irrespective of sex organ level (Herlihy & Eckert,  
413 2007; Jiménez-López *et al.*, 2019), as expected . This also indicates that stigma position is  
414 more amenable to changes in size unlike the anthers which are constrained by their  
415 attachment to the corolla tube (Faivre & McDade, 2001). As a consequence, stigma height in  
416 the long-styled as well as short-styled morph can readily respond to selection for higher  
417 outcross pollen deposition mediated by changes in herkogamy. Additionally, it suggests that  
418 the changes in anther height of both morphs in response to selection for altered pollen export  
419 will be hindered. The consequences of this inference for maintaining high reciprocity and  
420 sufficient inter-morph pollen flow in the lower sex organ level ultimately affecting the  
421 maintenance of the polymorphism should be further investigated.

422

423 The variation in herkogamy was related to variation in reciprocity in most of the study  
424 species. When the relationship between herkogamy and reciprocity is positive, plants can  
425 increase their capability to avoid self-pollen deposition while also increasing their chances of  
426 legitimate pollen transfer. But, when this relationship is negative, there will be a trade-off  
427 between the two functions. The former can be adaptive when plant populations are

428 not pollen limited, but there is high inbreeding depression (Ushimaru & Nakata, 2002).  
429 However, when populations are pollen limited and need reproductive assurance (Ashman *et*  
430 *al.*, 2004), a negative relationship will be a better strategy as it will ensure higher reciprocity  
431 with lower herkogamy and hence maximum reproductive assurance provided that  
432 heteromorphic incompatibility is absent. Differences in the direction of the relationship  
433 between morphs of a population and among populations is perhaps a manifestation of  
434 differences in local ecological scenarios and how that influences each morph.

435

436 In this study, we put together information regarding sex organ positions for a large number of  
437 species with style length polymorphism which helped us understand general patterns in  
438 herkogamy and reciprocity at the level of populations as well as individuals. One of the most  
439 important conclusions of this study is that the difference in order of presentation of sex  
440 organs between morphs can significantly influence difference in traits like herkogamy which  
441 are known to influence levels of inbreeding and outcrossing. Our results reveal that  
442 developmental causes can determine the likely consequence of intra-population variation in  
443 herkogamy on pollen export or receipt. Interestingly, we show that herkogamy and  
444 reciprocity can be related and a trade-off between avoidance of self-pollination and  
445 promotion of inter-morph pollination can exist. Future work that includes information on  
446 pollinators, incompatibility, pollen load and reproductive output etc. would help consolidate  
447 the results from this study. Such studies are needed to comprehensively understand the  
448 adaptive significance of sex organ positions in the maintenance of these polymorphisms. The  
449 lack of clear results in species with stigma-height dimorphism is likely due to the low sample  
450 size, a reflection of the handful of studies conducted on these species. Understanding the  
451 functional significance of sex organ positions in species with stigma-height dimorphism is

452 crucial to unravel the causes of evolution and maintenance of heterostyly and hence demands  
453 more attention.

#### 454 **AUTHOR CONTRIBUTIONS**

455 SG and DB conceived the idea and extracted the data. SG analysed the data. SG and DB  
456 wrote the manuscript.

457

#### 458 **REFERENCES**

459 **Armbruster WS, Bolstad GH, Hansen TF, Keller B, Conti E & Pélabon C. 2017.** The  
460 measure and mismeasure of reciprocity in heterostylous flowers. *New Phytologist* **215**: 906–  
461 917.

462 **Ashman TL, Knight TM, Steets JA, Amarasekare P, Burd M, Campbell DR, Dudash**  
463 **MR, Johnston MO, Mazer SJ, Mitchell RJ, Morgan MT & Wilson WG. 2004.** Pollen  
464 Limitation of Plant Reproduction: Ecological and Evolutionary Causes and Consequences.  
465 *Ecology* **85**: 2408–2421.

466 **Baena-Díaz F, Fornoni J, Sosenski P, Molina-Freaner FE, Weller SG, Pérez-Ishiwara R**  
467 **& Domínguez CA. 2012.** Changes in reciprocal herkogamy during the tristylly-distylly  
468 transition in *Oxalis alpina* increase efficiency in pollen transfer: Functional changes in  
469 herkogamy. *Journal of Evolutionary Biology* **25**: 574–583.

470 **Baker AM. 2000.** *The evolution and functional significance of stigma-height dimorphism in*  
471 *flowering plants*. PhD thesis. University of Toronto.

472 **Barranco D, Arroyo J & Santos-Gally R. 2019.** Avoiding sexual interference: herkogamy  
473 and dichogamy in style dimorphic flowers of *Narcissus broussonetii* (Amaryllidaceae). *AoB*  
474 *PLANTS* **11**. doi: 10.1093/aobpla/plz038

475 **Barrett SC. 2002.** The evolution of plant sexual diversity. *Nature reviews. Genetics* **3**: 274.

- 476 **Barrett SC, Jesson LK & Baker AM. 2000.** The evolution and function of stylar  
477 polymorphisms in flowering plants. *Annals of Botany* **85**: 253–265.
- 478 **Barrett SC & Richards JH. 1990.** Heterostyly in tropical plants. *Memoirs of the New York*  
479 *Botanical Garden*. **55**: 35–61.
- 480 **Barrett SCH & Shore JS. 2008.** New insights on heterostyly: comparative biology, ecology  
481 and genetics. In: Franklin-Tong VE, ed. *Self-incompatibility in flowering plants*. Berlin:  
482 Springer, 3–32.
- 483 **Berg RL. 1960.** The ecological significance of correlation pleiades. *Evolution*: 171–180.
- 484 **Cesaro AC, Barrett SCH, Maurice S, Vaissiere BE & Thompson JD. 2004.** An  
485 experimental evaluation of self-interference in *Narcissus assoanus*: functional and  
486 evolutionary implications. *Journal of evolutionary biology* **17**: 1367–1376.
- 487 **Faife-Cabrera M, Ferrero V & Navarro L. 2014.** Unravelling the stylar polymorphism in  
488 *Melochia* (Malvaceae): reciprocity and ancillary characters. *Botanical Journal of the Linnean*  
489 *Society* **176**: 147–158.
- 490 **Faivre AE. 2000.** Ontogenetic differences in heterostylous plants and implications for  
491 development from a herkogamous ancestor. *Evolution* **54**: 847–858.
- 492 **Faivre AE & McDade LA. 2001.** Population-level variation in the expression of heterostyly  
493 in three species of Rubiaceae: does reciprocal placement of anthers and stigmas characterize  
494 heterostyly? *American Journal of Botany* **88**: 841–853.
- 495 **Ferrero V, Castro S, Sánchez JM & Navarro L. 2011.** Stigma–anther reciprocity,  
496 pollinators, and pollen transfer efficiency in populations of heterostylous species of *Lithodora*  
497 and *Glandora* (Boraginaceae). *Plant Systematics and Evolution* **291**: 267–276.

- 498 **Ganders FR. 1979.** The biology of heterostyly. *New Zealand Journal of Botany* **17**: 607–  
499 635.
- 500 **Ganguly S & Barua D. 2020.** High herkogamy but low reciprocity characterizes isoplethtic  
501 populations of *Jasminum malabaricum*, a species with stigma-height dimorphism. *Plant*  
502 *Biology* **22**: 899–909.
- 503 **Haddadchi A. 2013.** Styler polymorphism, reciprocity and incompatibility systems in  
504 *Nymphoides montana* (Menyanthaceae) endemic to southeastern Australia. *Plant systematics*  
505 *and evolution* **299**: 389–401.
- 506 **Herlihy CR & Eckert CG. 2007.** Evolutionary Analysis of a Key Floral Trait in *Aquilegia*  
507 *canadensis* (ranunculaceae): Genetic Variation in Herkogamy and Its Effect on the Mating  
508 System. *Evolution* **61**: 1661–1674.
- 509 **Hernández-Ramírez AM. 2012.** Distyly, floral visitors, and fructification in 2 natural  
510 populations of *Psychotria nervosa* (Rubiaceae). *Écoscience* **19**: 133–139.
- 511 **Jacquemyn H, Gielen M & Brys R. 2018.** Is sexual organ reciprocity related to legitimate  
512 pollen deposition in distylous *Pulmonaria* (Boraginaceae)? *Oikos* **127**: 1216–1224.
- 513 **Jiménez-López FJ, Arista M, Talavera M, Pannell JR & Ortiz PL. 2019.** Heritabilities of  
514 lateral and vertical herkogamy in *Lysimachia arvensis*. *Plant Species Biology* **34**: 31–37.
- 515 **Jones E. 2012.** *Floral morphology and development in Houstonia procumbens (Rubiaceae),*  
516 *a uniquely distylous, cleistogamous species.* PhD thesis. The Florida State University.
- 517 **Kálmán K, Medvegy A, Péntes ZS & Mihalik E. 2007.** Morph-specific variation of floral  
518 traits associated with reciprocal herkogamy in natural populations of *Primula vulgaris* and  
519 *Primula veris*. *Plant systematics and evolution* **268**: 15–27.

- 520 **Keller B, de Vos JM, Schmidt-Lebuhn AN, Thomson JD & Conti E. 2016.** Both morph-  
521 and species-dependent asymmetries affect reproductive barriers between heterostylous  
522 species. *Ecology and Evolution* **6**: 6223–6244.
- 523 **Keller B, Thomson JD & Conti E. 2014.** Heterostyly promotes disassortative pollination  
524 and reduces sexual interference in Darwin’s primroses: evidence from experimental studies.  
525 *Functional Ecology* **28**: 1413–1425.
- 526 **Kudoh H, Sugawara T, Wu S & Murata JIN. 2001.** Morph-specific correlations between  
527 floral traits in a distylous *Ophiorrhiza napoensis* (Rubiaceae) population in southern China.  
528 *Journal of Tropical Ecology* **17**: 719–728.
- 529 **Lau P & Bosque C. 2003.** Pollen flow in the distylous *Palicourea fendleri* (Rubiaceae): an  
530 experimental test of the disassortative pollen flow hypothesis. *Oecologia* **135**: 593–600.
- 531 **Legendre P. 1998.** Model II regression user’s guide, R edition. *R Vignette* **14**.
- 532 **Legendre P. 2018.** lmodel2: Model II Regression. R package version 1.7-3. [https://cran.r-](https://cran.r-project.org/packagelmodel2)  
533 [project.org/packagelmodel2](https://cran.r-project.org/packagelmodel2).
- 534 **Li AM, Wu XQ, Zhang DX & Barrett SC. 2010.** Cryptic dioecy in *Mussaenda pubescens*  
535 (Rubiaceae): a species with stigma-height dimorphism. *Annals of Botany* **106**: 521–531.
- 536 **Lindenfors P, Revell LJ & Nunn CL. 2010.** Sexual Dimorphism in Primate Aerobic  
537 Capacity: A Phylogenetic Test. *Journal of evolutionary biology* **23**: 1183–1194.
- 538 **Liu Y, Luo Z, Wu X, Bai X & Zhang D. 2012.** Functional dioecy in *Morinda parvifolia*  
539 (Rubiaceae), a species with stigma-height dimorphism. *Plant systematics and evolution* **298**:  
540 775–785.



- 541 **Liu SJ, Wu LY & Huang SQ. 2016.** Shortened anther–stigma distance reduces compatible  
542 pollination in two distylous *Primula* species. *Journal of Plant Ecology* **9**: 224–232.
- 543 **Lloyd DG & Webb CJ. 1992a.** The evolution of heterostyly. In: Barrett SCH, ed. *Evolution*  
544 *and function of heterostyly*. Berlin: Springer, 151–178.
- 545 **Lloyd DG & Webb CJ. 1992b.** The selection of heterostyly. In: Barrett SCH, ed. *Evolution*  
546 *and function of heterostyly*. Berlin: Springer, 179–207.
- 547 **Massinga PH, Johnson SD & Harder LD. 2005.** Heteromorphic incompatibility and  
548 efficiency of pollination in two distylous *Pentanisia* species (Rubiaceae). *Annals of botany*  
549 **95**: 389–399.
- 550 **Meeus S, Brys R, Honnay O & Jacquemyn H. 2013.** Biological Flora of the British Isles:  
551 *Pulmonaria officinalis*. *Journal of Ecology* **101**: 1353–1368.
- 552 **Naiki A. 2012.** Heterostyly and the possibility of its breakdown by polyploidization. *Plant*  
553 *Species Biology* **27**: 3–29.
- 554 **Nicholls MS. 1985.** Pollen flow, population composition, and the adaptive significance of  
555 distyly in *Linum tenuifolium* L. (Linaceae). *Biological journal of the Linnean Society* **25**:  
556 235–242.
- 557 **Nishihiro J, Washitani I, Thomson JD & Thomson BA. 2000.** Patterns and consequences  
558 of stigma height variation in a natural population of a distylous plant, *Primula sieboldii*.  
559 *Functional Ecology* **14**: 502–512.
- 560 **Novo RR, Consolaro H, Almeida NM & Castro CC. 2018.** Floral biology of the velvetseed  
561 *Guettarda platypoda* DC. (Rubiaceae): Atypical distyly or style dimorphism? *Flora* **239**: 62–  
562 70.

- 563 **Olesen JM, Dupont YL, Ehlers BK, Valido A & Hansen DM. 2003.** Heterostyly in the  
564 Canarian endemic *Jasminum odoratissimum* (Oleaceae). *Nordic Journal of Botany* **23**: 537–  
565 539.
- 566 **Opedal ØH, Bolstad GH, Hansen TF, Armbruster WS & Pélabon C. 2017.** The  
567 evolvability of herkogamy: Quantifying the evolutionary potential of a composite trait.  
568 *Evolution* **71**: 1572–1586.
- 569
- 570 **Opedal ØH. 2018.** Herkogamy, a Principal Functional Trait of Plant Reproductive Biology.  
571 *International Journal of Plant Sciences* **179**: 677–687.
- 572 **Opler PA, Baker HG & Frankie GW. 1975.** Reproductive biology of some Costa Rican  
573 *Cordia* species (Boraginaceae). *Biotropica* **7**: 234–247.
- 574 **Pailler T & Thompson J. 1997.** Distyly and variation in heteromorphic incompatibility in  
575 *Gaertnera vaginata* (Rubiaceae) endemic to La Reunion Island. *American Journal of Botany*  
576 **84**: 315–315.
- 577 **Paradis E, Claude J & Strimmer K. 2004.** APE: analyses of phylogenetics and evolution in  
578 R language. *Bioinformatics* **20**: 289–290.
- 579 **Perez-Barrales R, Simon-Porcar VI, Santos-Gally R & Arroyo J. 2014.** Phenotypic  
580 integration in style dimorphic daffodils (*Narcissus*, Amaryllidaceae) with different  
581 pollinators. *Philosophical Transactions of the Royal Society B-Biological Sciences* **369**:  
582 20130258. doi: 10.1098/rstb.2013.0258
- 583 **Pérez-Barrales R & Arroyo J. 2010.** Pollinator shifts and the loss of style polymorphism in  
584 *Narcissus papyraceus* (Amaryllidaceae). *Journal of Evolutionary Biology* **23**: 1117–1128.

- 585 **Pérez-Barrales R, Arroyo J & Scott Armbruster W. 2007.** Differences in pollinator faunas  
586 may generate geographic differences in floral morphology and integration in *Narcissus*  
587 *papyraceus* (Amaryllidaceae). *Oikos* **116**: 1904–1918.
- 588 **R Core Team. 2020.** R: A language and environment for statistical computing. R Foundation  
589 for Statistical Computing, Vienna, Austria.
- 590 **Revell LJ. 2012.** phytools: an R package for phylogenetic comparative biology (and other  
591 things). *Methods in Ecology and Evolution* **3**: 217–223.
- 592 **Richards JH & Koptur S. 1993.** Floral Variation and Distyly in *Guettarda scabra*  
593 (Rubiaceae). *American Journal of Botany* **80**: 31–40.
- 594 **Runions CJ & Geber MA. 2000.** Evolution of the self-pollinating flower in *Clarkia*  
595 *xantiana* (Onagraceae). I. Size and development of floral organs. *American Journal of Botany*  
596 **87**: 1439–1451.
- 597 **Santos-Gally R, Perez-Barrales R, Simon VI & Arroyo J. 2013.** The role of short-tongued  
598 insects in floral variation across the range of a style-dimorphic plant. *Annals of Botany* **111**:  
599 317–328.
- 600 **Simon-Porcar VI, de Castro A, Herrero M & Arroyo J. 2015.** Ovarian self-  
601 incompatibility in *Narcissus papyraceus* (Amaryllidaceae) is the result of a pre-zygotic  
602 response. *Botanical Journal of the Linnean Society* **177**: 629–643.
- 603 **Simón-Porcar VI, Santos-Gally R & Arroyo J. 2014.** Long-tongued insects promote  
604 disassortative pollen transfer in style-dimorphic *Narcissus papyraceus* (Amaryllidaceae).  
605 *Journal of Ecology* **102**: 116–125.

- 606 **Smith SA & Brown JW. 2018.** Constructing a broadly inclusive seed plant phylogeny.  
607 *American Journal of Botany* **105**: 302–314.
- 608 **Stone JL & Thomson JD. 1994.** The Evolution of Distyly: Pollen Transfer in Artificial  
609 Flowers. *Evolution* **48**: 1595–1606.
- 610 **Thompson JD & Dommee B. 2000.** Morph-specific patterns of variation in stigma height in  
611 natural populations of distylous *Jasminum fruticans*. *New Phytologist* **148**: 303–314.
- 612 **Ushimaru A & Nakata K. 2002.** The evolution of flower allometry in selfing species.  
613 *Evolutionary Ecology Research* **4**: 1217–1227.
- 614 **Webb CJ & Lloyd DG. 1986.** The avoidance of interference between the presentation of  
615 pollen and stigmas in angiosperms II. Herkogamy. *New Zealand Journal of Botany* **24**: 163–  
616 178.
- 617 **Zhou W, Barrett SC, Wang H & Li DZ. 2015.** Reciprocal herkogamy promotes  
618 disassortative mating in a distylous species with intramorph compatibility. *New Phytologist*  
619 **206**: 1503–1512.
